# Supplementary material for: Portable, bedside, low-field magnetic resonance imaging for evaluation of intracerebral hemorrhage
Source: PubMed Central journal article supplement (PMC8387402; doi:10.1038/s41467-021-25441-6), 2021-08-25
Supplement: 41467_2021_25441_MOESM3_ESM.pdf [file 41467_2021_25441_MOESM3_ESM.pdf]

## Reporting Summary

Nature Research wishes to improve the reproducibility of the work that we publish. This form provides structure for consistency and transparency in reporting. For further information on Nature Research policies, see our [Editorial Policies](#) and the [Editorial Policy Checklist](#).

### Statistics

For all statistical analyses, confirm that the following items are present in the figure legend, table legend, main text, or Methods section.

n/a Confirmed

- |                                     |                                     |                                                                                                                                                                                                                                                            |
|-------------------------------------|-------------------------------------|------------------------------------------------------------------------------------------------------------------------------------------------------------------------------------------------------------------------------------------------------------|
| <input type="checkbox"/>            | <input checked="" type="checkbox"/> | The exact sample size ( $n$ ) for each experimental group/condition, given as a discrete number and unit of measurement                                                                                                                                    |
| <input type="checkbox"/>            | <input checked="" type="checkbox"/> | A statement on whether measurements were taken from distinct samples or whether the same sample was measured repeatedly                                                                                                                                    |
| <input type="checkbox"/>            | <input checked="" type="checkbox"/> | The statistical test(s) used AND whether they are one- or two-sided<br><i>Only common tests should be described solely by name; describe more complex techniques in the Methods section.</i>                                                               |
| <input type="checkbox"/>            | <input checked="" type="checkbox"/> | A description of all covariates tested                                                                                                                                                                                                                     |
| <input checked="" type="checkbox"/> | <input type="checkbox"/>            | A description of any assumptions or corrections, such as tests of normality and adjustment for multiple comparisons                                                                                                                                        |
| <input type="checkbox"/>            | <input checked="" type="checkbox"/> | A full description of the statistical parameters including central tendency (e.g. means) or other basic estimates (e.g. regression coefficient) AND variation (e.g. standard deviation) or associated estimates of uncertainty (e.g. confidence intervals) |
| <input type="checkbox"/>            | <input checked="" type="checkbox"/> | For null hypothesis testing, the test statistic (e.g. $F$ , $t$ , $r$ ) with confidence intervals, effect sizes, degrees of freedom and $P$ value noted<br><i>Give <math>P</math> values as exact values whenever suitable.</i>                            |
| <input checked="" type="checkbox"/> | <input type="checkbox"/>            | For Bayesian analysis, information on the choice of priors and Markov chain Monte Carlo settings                                                                                                                                                           |
| <input checked="" type="checkbox"/> | <input type="checkbox"/>            | For hierarchical and complex designs, identification of the appropriate level for tests and full reporting of outcomes                                                                                                                                     |
| <input type="checkbox"/>            | <input checked="" type="checkbox"/> | Estimates of effect sizes (e.g. Cohen's $d$ , Pearson's $r$ ), indicating how they were calculated                                                                                                                                                         |

*Our web collection on [statistics for biologists](#) contains articles on many of the points above.*

### Software and code

Policy information about [availability of computer code](#)

Data collection The pMRI underwent multiple software updates over the course of the study, including: software versions RC3, RC4, RC5, RC6, RC7, RC8.

Data analysis Horos (v.3.3.5), RadiAnt (v.2020.2.3), RStudio (v.3.6.1), AFNI (v. 21.1.02)

For manuscripts utilizing custom algorithms or software that are central to the research but not yet described in published literature, software must be made available to editors and reviewers. We strongly encourage code deposition in a community repository (e.g. GitHub). See the Nature Research [guidelines for submitting code & software](#) for further information.

### Data

Policy information about [availability of data](#)

All manuscripts must include a [data availability statement](#). This statement should provide the following information, where applicable:

- Accession codes, unique identifiers, or web links for publicly available datasets
- A list of figures that have associated raw data
- A description of any restrictions on data availability

Source data are provided with this paper as a source data file. Raw data associated with Tables 1, 2, and 3 and Figures 4 and 5 are included in the source data file. While a public portable MRI neuroimaging repository is not established yet, there are ongoing efforts to make the neuroimaging data publicly available. In the interim, the neuroimaging studies analysed during the current study are available from the corresponding author upon request.

## Field-specific reporting

Please select the one below that is the best fit for your research. If you are not sure, read the appropriate sections before making your selection.

Life sciences       Behavioural & social sciences       Ecological, evolutionary & environmental sciences

For a reference copy of the document with all sections, see [nature.com/documents/nr-reporting-summary-flat.pdf](https://www.nature.com/documents/nr-reporting-summary-flat.pdf)

## Life sciences study design

All studies must disclose on these points even when the disclosure is negative.

|                 |                                                                                                                                                                                                                                                                                                                                                                                                                                                                                                                                                                                                                              |
|-----------------|------------------------------------------------------------------------------------------------------------------------------------------------------------------------------------------------------------------------------------------------------------------------------------------------------------------------------------------------------------------------------------------------------------------------------------------------------------------------------------------------------------------------------------------------------------------------------------------------------------------------------|
| Sample size     | No statistical methods were used to compute a predetermined sample size. The sample size was selected based on a convenience sample including the number of subjects who received a portable MRI brain examination from July 2018 to November 2020 at Yale New Haven Hospital. Subjects who met the following inclusion criteria were included in the convenience sample: (1) confirmed diagnosis of intracerebral hemorrhage, ischemic stroke or no intracranial abnormality on available standard-of-care CT or MRI neuroimaging; (2) the acquisition of both T2W and FLAIR sequences during the portable MRI examination. |
| Data exclusions | A total of 15 exams were excluded from this analysis based on pre-established exclusion criteria. Nine exams were excluded due to the patient having a body habitus that prevented full brain insertion into the scanner's head coil and produced an incomplete field-of-view. Six exams were severely motion degraded and did not yield interpretable results. These 15 exams were excluded from all experiments included in the manuscript.                                                                                                                                                                                |
| Replication     | To verify the reproducibility of the experimental findings, we used a panel of blinded raters, all with established expertise reading clinical neuroimaging studies but with a range of experience. All raters were able to successfully adjudicate neuroimaging studies and provide an assessment. Each blinded rater independently assessed the 144 exams one time.                                                                                                                                                                                                                                                        |
| Randomization   | This analysis is an observational study in which all subjects received a portable MRI examination                                                                                                                                                                                                                                                                                                                                                                                                                                                                                                                            |
| Blinding        | Raters were blinded to all clinical and demographic data during data analysis. The investigators were not blinded to group allocation during data collection. Blinding investigators was not possible as they were required to screen the patients for study eligibility.                                                                                                                                                                                                                                                                                                                                                    |

## Reporting for specific materials, systems and methods

We require information from authors about some types of materials, experimental systems and methods used in many studies. Here, indicate whether each material, system or method listed is relevant to your study. If you are not sure if a list item applies to your research, read the appropriate section before selecting a response.

### Materials & experimental systems

| n/a                                 | Involvement in the study                                        |
|-------------------------------------|-----------------------------------------------------------------|
| <input checked="" type="checkbox"/> | <input type="checkbox"/> Antibodies                             |
| <input checked="" type="checkbox"/> | <input type="checkbox"/> Eukaryotic cell lines                  |
| <input checked="" type="checkbox"/> | <input type="checkbox"/> Palaeontology and archaeology          |
| <input checked="" type="checkbox"/> | <input type="checkbox"/> Animals and other organisms            |
| <input type="checkbox"/>            | <input checked="" type="checkbox"/> Human research participants |
| <input checked="" type="checkbox"/> | <input type="checkbox"/> Clinical data                          |
| <input checked="" type="checkbox"/> | <input type="checkbox"/> Dual use research of concern           |

### Methods

| n/a                                 | Involvement in the study                                   |
|-------------------------------------|------------------------------------------------------------|
| <input checked="" type="checkbox"/> | <input type="checkbox"/> ChIP-seq                          |
| <input checked="" type="checkbox"/> | <input type="checkbox"/> Flow cytometry                    |
| <input type="checkbox"/>            | <input checked="" type="checkbox"/> MRI-based neuroimaging |

## Human research participants

Policy information about [studies involving human research participants](#)

### Population characteristics

Human research participants included in this analysis as patient participants had a mean age of  $64 \pm 14$  years. The cohort was comprised of 81 males and 51 females who were diagnosed with intracerebral hemorrhage ( $n=50$ ), ischemic stroke ( $n=44$ ), or no intracranial abnormality ( $n=38$ ). Race and baseline medical history were only collected for subjects presenting with intracerebral hemorrhage and ischemic stroke. Subjects identified as white ( $n=64$ ), black or African American ( $n=13$ ), asian ( $n=8$ ), other ( $n=6$ ), or unknown ( $n=3$ ). Subjects reported a previous stroke ( $n=12$ ), hypertension ( $n=58$ ), hyperlipidemia ( $n=36$ ), diabetes mellitus ( $n=21$ ), and/or atrial fibrillation ( $n=14$ ). Non-patient healthy controls had a mean age of  $41 \pm 11$  years and included 28 males and 10 females.

### Recruitment

From July 2018 to March 2020, portable MRI examinations were performed under a research protocol and participants provided informed consent. From March 2020 to November 2020, the device operated under FDA clearance and subjects received portable MRI exams as part of clinical care. To avoid disruption to the acute clinical workup of patients presenting with stroke, subjects were approached for recruitment a few days after hospital admission on average. As a result, the majority of the portable MRI examinations largely occurred within the subacute phase, resulting in a potential self-selection bias on timing of pathology. Moreover, when the device operated as a research study, critically ill patients were not enrolled as frequently due to the severity of their illness and thus, patients in the first half of the study typically had lower NIHSS and discharge mRS values.

Non-patient research participants scanned at Hyperfine HQ were recruited by distribution of flyers to a large group. Interested volunteers then contacted Hyperfine contacts, traveled to Hyperfine HQ in Guildford, CT, and signed the informed consent form prior to participating.

### Ethics oversight

All patient data collected at Yale New Haven Hospital was performed under an Institutional Review Board (IRB) protocol approved by Yale Human Research Protection Program. All healthy control imaging at Hyperfine HQ was performed under a protocol approved by the Western Institutional Review Board-Copernicus Group (WCG) local IRB .

Note that full information on the approval of the study protocol must also be provided in the manuscript.

## Magnetic resonance imaging

### Experimental design

#### Design type

Observational

#### Design specifications

All subjects received one 17:51 minute portable MRI brain examination. Subjects with prolonged ICU admissions and willingness to undergo serial neuroimaging received additional portable MRI examinations throughout their ICU stay.

#### Behavioral performance measures

N/A, this study used structural magnetic resonance imaging (not functional) and did not require participants to undergo any behavioral performance measures or tasks during examination.

### Acquisition

#### Imaging type(s)

Structural

#### Field strength

0.064 T

#### Sequence & imaging parameters

For T2W fast spin echo (FSE) imaging, relevant acquisition parameters were organized as follows (RC8/RC5/RC3): echo time [TE] = 252.6/252.3/200.5 ms, repetition time [TR]= 2200/2000/2000 ms, echo train length=80/72/64, number of averages=1/1/1, resolution=1.5x1.5x5 mm3/1.5x1.5x5 mm3/1.7x1.7x5 mm3, slices=36/36/36, acquisition time: 7:01/5:28/8:39 min. For FLAIR FSE, relevant acquisition parameters were: [TE]= 227.5/172.6/155.28 ms, [TR] =4000/1000/1000 ms, echo train length=80/48/48, number of averages=1/1/1, resolution: 1.6x1.6x5 mm3/1.5x1.5x5 mm3/1.7x1.7x5 mm3, slices=36/36/36, acquisition time=9:29/8:11/8:35 min.

#### Area of acquisition

Whole brain

#### Diffusion MRI

Used

Not used

### Preprocessing

#### Preprocessing software

No preprocessing software was used.

#### Normalization

No spatial normalization was applied.

#### Normalization template

No spatial normalization was applied.

#### Noise and artifact removal

The portable MRI scanner operates in normal ICU rooms without RF shielding. The scanner has hardware noise detection coils and software to separate MRI signal from electromagnetic magnetic interference from the surrounding environment.

#### Volume censoring

No volume censoring was applied.

## Statistical modeling & inference

Model type and settings

Effect(s) tested

Specify type of analysis:  Whole brain  ROI-based  Both

Statistic type for inference  
(See [Eklund et al. 2016](#))

Correction

## Models & analysis

n/a | Involved in the study

Functional and/or effective connectivity

Graph analysis

Multivariate modeling or predictive analysis

Multivariate modeling and predictive analysis

Manual and ABC/2 hematoma volumes on pMRI sequences (T2W and FLAIR) were correlated with National Institutes of Health Stroke Scale (NIHSS) obtained at the closest time to pMRI examination and modified Rankin score (mRS) at discharge using unadjusted and adjusted linear regression models. Adjusted linear regression models included sex, race, and age.
